# Supplementary material
Source: publisher figshare collection journal article supplement (https://wiley.figshare.com/ndownloader/files/12543035)
Supplement: Supplementary file 1 [file 12543035]

## Sheet: SI-Data Table 2 Metrics
		Major characteristics					Benthic Data: Derived biological metrics								Ephemeroptera										Plecoptera								Trichoptera							Diptera									Coleoptera
Collection Day	Streams	T °C	pH	Conductivity (µs/cm)	DO (mg/L)		Total abund.	Mayfly abund.	"Sensitive" mayfly abund. (Rhithrogena, Cinygmula, Ephemerella)	Taxa richness	Mayfly taxa richness	Diptera abundance	Diptera richness		Cinygmula sp.	Rhithrogena sp.	Baetidae	Paraleptophlebia sp.	Ameletus sp.	Ephemerella dorothea infrequens	Epeorus sp.	Drunella doddsi	Drunella grandis/coloradensis		Skwala spp.	Sweltsa spp.	Capniidae	Chloroperlidae	Isoperla sp.	Pteronarcys californica	Immature Plecoptera		Brachycentrus sp.	Lepidostoma sp.	Arctopsyche grandis	Glossosoma sp.	Dolophilodes aequalis	Hydropsyche sp.		Tribe Chironomini	Tribe Tanytarsini	Tribe Orthocladinae	Tribe Tanypodinae	Tribe Diamesinae	Simuliidae	Clinocera sp.	Diptera pupae		Heterlimnius corpulentus larvae
0	River control 1	na	na	na	na		182	56	22	15	6	79	4		4	16	31	2	1	2	0	0	0		2	1	33	0	0	0	0		3	8	0	0	0	0		0	59	16	3	0	0	1	0		0
0	River control 2	na	na	na	na		192	145	18	13	6	27	4		2	15	123	1	0	1	3	0	0		0	0	18	0	0	0	0		0	0	1	0	0	0		0	3	21	1	0	2	0	0		0
0	River control 3	na	na	na	na		258	191	18	19	7	39	4		3	13	165	1	0	2	3	4	0		1	0	18	2	0	0	0		3	1	1	1	0	0		0	21	16	1	0	1	0	0		0
0	River control 4	na	na	na	na		226	101	21	16	5	80	5		0	12	75	0	0	9	4	0	1		1	0	33	5	0	0	0		1	4	0	0	0	0		0	44	29	3	0	2	2	0		1
0	Average	na	na	na	na		214.5	123.25	19.75	15.75	6	56.25	4.25		2.25	14	98.5	1	0.25	3.5	2.5	1	0.25		1	0.25	25.5	1.75	0	0	0		1.75	3.25	0.5	0.25	0	0		0	31.75	20.5	2	0	1.25	0.75	0		0.25
0	Standard deviation	na	na	na	na		34.5784	57.9677	2.06155	2.5	0.816497	27.2932	0.5		1.70783	1.82574	58.112	0.816497	0.5	3.69685	1.73205	2	0.5		0.816497	0.5	8.66025	2.36291	0	0	0		1.5	3.59398	0.57735	0.5	0	0		0	24.7302	6.13732	1.1547	0	0.957427	0.957427	0		0.5
4	A3	na	na	na	na		226	150	27	15	7	49	2		0	22	112	1	0	5	7	2	1		0	1	19	1	0	0	0		3	2	0	0	0	0		0	9	40	0	0	0	0	0		0
4	D7	9.1	6.54	64.5	8.81		146	102	26	14	6	34	4		0	25	67	0	0	1	2	3	4		0	1	6	2	1	0	0		0	0	0	0	0	0		0	6	26	0	0	1	0	1		0
4	C9	8.9	6.57	64.1	8.82		104	66	25	15	7	31	3		0	24	30	1	0	1	6	2	2		1	0	2	0	2	0	0		1	0	0	1	0	0		0	9	20	0	0	2	0	0		0
4	B6	9.3	6.83	63.8	8.76		172	118	19	13	6	36	3		0	17	94	0	0	2	2	2	1		0	0	11	0	2	0	0		3	2	0	0	0	0		0	12	22	0	0	2	0	0		0
4	Average	9.1	6.64667	64.1333	8.79667		162	109	24.25	14.25	6.5	37.5	3		0	22	75.75	0.5	0	2.25	4.25	2.25	2		0.25	0.5	9.5	0.75	1.25	0	0		1.75	1	0	0.25	0	0		0	9	27	0	0	1.25	0	0.25		0
4	Standard deviation	0.2	0.159478	0.351188	0.0321455		51.0425	34.9285	3.59398	0.957427	0.57735	7.93725	0.816497		0	3.55903	35.6686	0.57735	0	1.89297	2.62996	0.5	1.41421		0.5	0.57735	7.32575	0.957427	0.957427	0	0		1.5	1.1547	0	0.5	0	0		0	2.44949	9.0185	0	0	0.957427	0	0.5		0
6	B3	9.05	6.765	66.5	9.09		196	105	23	16	7	72	5		0	23	69	6	1	0	3	1	2		0	2	14	2	0	0	0		1	0	0	0	0	0		0	49	19	0	0	1	2	1		0
6	C8	8.95	7.26	63.85	9.14		147	67	22	16	7	71	4		4	17	39	4	0	1	1	1	0		1	0	5	1	0	0	0		0	1	0	0	0	0		0	24	45	1	0	1	0	0		0
6	Average	9	7.0125	65.175	9.115		171.5	86	22.5	16	7	71.5	4.5		2	20	54	5	0.5	0.5	2	1	1		0.5	1	9.5	1.5	0	0	0		0.5	0.5	0	0	0	0		0	36.5	32	0.5	0	1	1	0.5		0
6	Standard deviation	0.0707107	0.350018	1.87383	0.0353553		34.6482	26.8701	0.707107	0	0	0.707107	0.707107		2.82843	4.24264	21.2132	1.41421	0.707107	0.707107	1.41421	0	1.41421		0.707107	1.41421	6.36396	0.707107	0	0	0		0.707107	0.707107	0	0	0	0		0	17.6777	18.3848	0.707107	0	0	1.41421	0.707107		0
8	C2	9.5	6.62	64.2	8.91		256	171	21	13	6	64	4		2	18	145	4	0	1	1	0	0		0	0	19	1	0	0	0		0	0	0	0	0	0		0	10	48	0	0	5	0	1		0
8	A4	9.33333	6.4	65.8333	8.96		321	219	27	16	8	84	4		2	22	183	1	0	3	4	2	2		0	0	13	3	0	0	0		1	1	0	0	0	0		0	14	62	0	0	7	0	1		0
8	Average	9.41667	6.51	65.0167	8.935		288.5	195	24	14.5	7	74	4		2	20	164	2.5	0	2	2.5	1	1		0	0	16	2	0	0	0		0.5	0.5	0	0	0	0		0	12	55	0	0	6	0	1		0
8	Standard deviation	0.117851	0.155563	1.15494	0.0353553		45.9619	33.9411	4.24264	2.12132	1.41421	14.1421	0		0	2.82843	26.8701	2.12132	0	1.41421	2.12132	1.41421	1.41421		0	0	4.24264	1.41421	0	0	0		0.707107	0.707107	0	0	0	0		0	2.82843	9.89949	0	0	1.41421	0	0		0
10	B4	9.225	6.835	65.575	8.96		218	159	13	16	7	42	4		0	11	136	3	0	2	4	1	2		0	1	11	0	0	0	0		2	2	0	0	0	0		0	9	29	0	0	3	0	1		0
10	C6	9.7	na	65.1	8.905		168	121	22	13	6	35	3		1	20	93	0	0	1	3	3	0		0	0	7	1	2	0	0		0	0	0	2	0	0		0	6	25	0	0	0	0	4		0
10	B8	9.34	6.78	65.7	8.904		324	251	26	16	7	57	5		4	21	221	0	0	1	1	1	2		0	0	13	1	0	1	0		1	0	0	0	0	0		0	2	45	1	0	2	0	7		0
10	D2	9.06667	6.67	65.2333	8.94667		182	106	22	16	8	60	5		1	17	76	3	0	4	1	3	1		0	0	14	0	0	0	0		1	1	0	0	0	0		0	17	34	1	0	5	0	3		0
10	Average	9.33292	6.76167	65.4021	8.92892		223	159.25	20.75	15.25	7	48.5	4.25		1.5	17.25	131.5	1.5	0	2	2.25	2	1.25		0	0.25	11.25	0.5	0.5	0.25	0		1	0.75	0	0.5	0	0		0	8.5	33.25	0.5	0	2.5	0	3.75		0
10	Standard deviation	0.269156	0.0840139	0.28189	0.0287175		70.5502	65.107	5.5	1.5	0.816497	11.9583	0.957427		1.73205	4.5	64.7894	1.73205	0	1.41421	1.5	1.1547	0.957427		0	0.5	3.0957	0.57735	1	0.5	0		0.816497	0.957427	0	1	0	0		0	6.35085	8.65544	0.57735	0	2.08167	0	2.5		0
12	A6	9.33333	7.12	66.9667	9.06667		221	130	11	15	5	75	5		0	9	109	2	0	2	8	0	0		1	0	11	0	0	0	0		2	1	0	0	0	0		0	49	22	0	0	1	1	2		0
12	D9	9.6	6.895	65.95	8.8875		207	146	27	15	6	45	5		1	26	110	0	0	0	5	3	1		0	0	10	0	0	1	0		3	2	0	0	0	0		0	12	23	1	0	6	0	3		0
12	Average	9.46667	7.0075	66.4583	8.97708		214	138	19	15	5.5	60	5		0.5	17.5	109.5	1	0	1	6.5	1.5	0.5		0.5	0	10.5	0	0	0.5	0		2.5	1.5	0	0	0	0		0	30.5	22.5	0.5	0	3.5	0.5	2.5		0
12	Standard deviation	0.188562	0.159099	0.718892	0.12669		9.89949	11.3137	11.3137	0	0.707107	21.2132	0		0.707107	12.0208	0.707107	1.41421	0	1.41421	2.12132	2.12132	0.707107		0.707107	0	0.707107	0	0	0.707107	0		0.707107	0.707107	0	0	0	0		0	26.163	0.707107	0.707107	0	3.53553	0.707107	0.707107		0
14	A7	9.63333	7.06667	66.0667	8.88333		298	233	27	13	6	52	4		0	25	199	1	0	2	4	2	0		0	0	10	2	0	0	0		0	0	0	0	1	0		0	4	29	0	0	4	0	15		0
14	C7	9.1	7.08	65.8429	9.00143		138	55	13	15	6	70	4		1	8	37	0	0	4	4	1	0		2	2	6	0	0	0	0		2	1	0	0	0	0		0	53	15	1	0	0	1	0		0
14	Average	9.36667	7.07333	65.9548	8.94238		218	144	20	14	6	61	4		0.5	16.5	118	0.5	0	3	4	1.5	0		1	1	8	1	0	0	0		1	0.5	0	0	0.5	0		0	28.5	22	0.5	0	2	0.5	7.5		0
14	Standard deviation	0.377124	0.00942809	0.158257	0.0835059		113.137	125.865	9.89949	1.41421	0	12.7279	0		0.707107	12.0208	114.551	0.707107	0	1.41421	0	0.707107	0		1.41421	1.41421	2.82843	1.41421	0	0	0		1.41421	0.707107	0	0	0.707107	0		0	34.6482	9.89949	0.707107	0	2.82843	0.707107	10.6066		0
16	A1	10.2	6.89	71.7333	8.86333		209	140	7	16	6	54	5		0	6	125	0	0	1	6	1	1		0	1	11	0	0	0	0		1	1	0	0	0	0		0	10	29	0	0	4	1	10		0
16	D3	10.08	7.07	65.6	8.898		156	124	17	17	8	20	4		2	14	101	1	0	1	1	2	2		1	0	8	0	0	0	0		0	1	0	1	0	0		0	7	8	0	0	3	0	2		0
16	Average	10.14	6.98	68.6667	8.88067		182.5	132	12	16.5	7	37	4.5		1	10	113	0.5	0	1	3.5	1.5	1.5		0.5	0.5	9.5	0	0	0	0		0.5	1	0	0.5	0	0		0	8.5	18.5	0	0	3.5	0.5	6		0
16	Standard deviation	0.0848528	0.127279	4.33692	0.024513		37.4767	11.3137	7.07107	0.707107	1.41421	24.0416	0.707107		1.41421	5.65685	16.9706	0.707107	0	0	3.53553	0.707107	0.707107		0.707107	0.707107	2.12132	0	0	0	0		0.707107	0	0	0.707107	0	0		0	2.12132	14.8492	0	0	0.707107	0.707107	5.65685		0
18	D5	9.16667	7.108	66.1167	9.00667		300	213	31	12	5	76	5		3	26	180	0	0	2	2	0	0		0	3	8	0	0	0	0		0	0	0	0	0	0		0	4	34	2	0	20	0	16		0
18	B1	9.68	6.945	66.7	8.926		182	144	33	14	7	32	4		2	29	104	0	0	2	2	2	3		0	0	4	0	1	0	0		1	0	0	0	0	0		0	6	8	0	0	9	0	9		0
18	Average	9.42333	7.0265	66.4083	8.96633		241	178.5	32	13	6	54	4.5		2.5	27.5	142	0	0	2	2	1	1.5		0	1.5	6	0	0.5	0	0		0.5	0	0	0	0	0		0	5	21	1	0	14.5	0	12.5		0
18	Standard deviation	0.362981	0.115258	0.412479	0.0570399		83.4386	48.7904	1.41421	1.41421	1.41421	31.1127	0.707107		0.707107	2.12132	53.7401	0	0	0	0	1.41421	2.12132		0	2.12132	2.82843	0	0.707107	0	0		0.707107	0	0	0	0	0		0	1.41421	18.3848	1.41421	0	7.77817	0	4.94975		0
20	C5	9.7	7.04667	66.44	8.96		227	114	13	9	3	109	4		0	13	99	0	0	0	2	0	0		1	0	3	0	0	0	0		0	0	0	0	0	0		0	12	30	0	0	51	0	16		0
20	B7	9.6375	7.03714	67.775	8.91375		223	137	17	17	8	73	4		0	15	112	1	1	2	4	1	1		0	1	8	0	2	0	0		1	0	0	0	0	1		0	16	19	0	0	17	0	21		0
20	A5	10	6.835	66.25	8.84		234	154	18	12	6	75	5		3	15	130	0	0	0	2	1	3		0	0	5	0	0	0	0		0	0	0	0	0	0		0	3	18	2	0	16	0	36		0
20	Average	9.77917	6.97294	66.8217	8.90458		228	135	16	12.6667	5.66667	85.6667	4.33333		1	14.3333	113.667	0.333333	0.333333	0.666667	2.66667	0.666667	1.33333		0.333333	0.333333	5.33333	0	0.666667	0	0		0.333333	0	0	0	0	0.333333		0	10.3333	22.3333	0.666667	0	28	0	24.3333		0
20	Standard deviation	0.193784	0.119551	0.831059	0.0605229		5.56776	20.0749	2.64575	4.04145	2.51661	20.232	0.57735		1.73205	1.1547	15.5671	0.57735	0.57735	1.1547	1.1547	0.57735	1.52753		0.57735	0.57735	2.51661	0	1.1547	0	0		0.57735	0	0	0	0	0.57735		0	6.65833	6.65833	1.1547	0	19.9249	0	10.4083		0
24	C1	9.72222	7.09222	67.1333	8.92778		129	80	21	13	5	44	4		0	21	50	0	0	0	2	4	3		1	1	0	0	1	0	0		2	0	0	0	0	0		0	16	6	0	0	14	0	8		0
24	B5	9.58889	7.0625	68.0333	8.92		171	117	24	17	7	38	4		2	21	83	1	0	1	8	0	1		1	0	10	1	0	0	0		1	2	0	0	0	1		0	11	8	0	0	15	0	4		0
24	D8	10.1	7.165	69.0375	8.92625		103	57	30	15	6	36	4		6	24	22	1	0	0	2	0	2		0	0	3	1	0	0	0		1	4	0	1	0	0		0	10	7	0	0	7	0	12		0
24	Average	9.8037	7.10657	68.0681	8.92468		134.333	84.6667	25	15	6	39.3333	4		2.66667	22	51.6667	0.666667	0	0.333333	4	1.33333	2		0.666667	0.333333	4.33333	0.666667	0.333333	0	0		1.33333	2	0	0.333333	0	0.333333		0	12.3333	7	0	0	12	0	8		0
24	Standard deviation	0.265119	0.0527356	0.952558	0.00412089		34.3123	30.271	4.58258	2	1	4.16333	0		3.05505	1.73205	30.5341	0.57735	0	0.57735	3.4641	2.3094	1		0.57735	0.57735	5.1316	0.57735	0.57735	0	0		0.57735	2	0	0.57735	0	0.57735		0	3.21455	1	0	0	4.3589	0	4		0
28	B2	10.0333	7.26857	69.2889	8.82556		144	76	17	17	6	58	4		3	13	52	0	0	1	3	4	0		1	1	2	3	0	0	1		0	1	0	0	0	1		0	33	9	0	0	15	0	1		0
28	A2	9.92727	7.13182	67.0818	8.86545		142	72	29	16	7	61	4		11	16	33	0	0	2	5	4	1		0	1	4	0	0	1	0		2	0	0	1	0	0		0	24	5	0	0	29	0	3		0
28	C3	9.63571	7.10417	68.0571	8.90643		202	123	15	15	6	70	4		3	12	98	4	0	0	5	0	1		0	3	3	1	1	0	0		0	0	0	0	0	1		0	17	7	0	0	30	0	16		0
28	Average	9.86544	7.16819	68.1426	8.86581		162.667	90.3333	20.3333	16	6.33333	63	4		5.66667	13.6667	61	1.33333	0	1	4.33333	2.66667	0.666667		0.333333	1.66667	3	1.33333	0.333333	0.333333	0.333333		0.666667	0.333333	0	0.333333	0	0.666667		0	24.6667	7	0	0	24.6667	0	6.66667		0
28	Standard deviation	0.205895	0.0880293	1.10602	0.0404377		34.0783	28.3608	7.57188	1	0.57735	6.245	0		4.6188	2.08167	33.4215	2.3094	0	1	1.1547	2.3094	0.57735		0.57735	1.1547	1	1.52753	0.57735	0.57735	0.57735		1.1547	0.57735	0	0.57735	0	0.57735		0	8.02081	2	0	0	8.3865	0	8.14453		0
32	D4	9.875	7.275	67.075	8.77583		137	62	9	18	7	68	6		6	2	46	3	0	1	3	1	0		1	0	2	0	0	0	0		1	2	1	0	0	0		0	30	8	1	0	19	1	9		0
32	A8	9.83333	7.1175	67.1667	8.73267		153	58	21	15	5	86	4		5	16	28	1	0	0	8	0	0		0	1	4	1	1	0	0		1	0	0	1	0	0		0	50	3	0	0	22	0	11		0
32	D6	10.2	7.195	67.6636	8.81909		174	83	13	18	7	82	6		5	7	58	4	0	1	7	0	1		0	2	2	1	0	0	0		0	3	1	0	0	0		0	35	10	1	0	27	1	8		0
32	Average	9.96944	7.19583	67.3018	8.77586		154.667	67.6667	14.3333	17	6.33333	78.6667	5.33333		5.33333	8.33333	44	2.66667	0	0.666667	6	0.333333	0.333333		0.333333	1	2.66667	0.666667	0.333333	0	0		0.666667	1.66667	0.666667	0.333333	0	0		0	38.3333	7	0.666667	0	22.6667	0.666667	9.33333		0
32	Standard deviation	0.200751	0.0787533	0.316721	0.0432121		18.5562	13.4288	6.1101	1.73205	1.1547	9.45163	1.1547		0.57735	7.0946	15.0997	1.52753	0	0.57735	2.64575	0.57735	0.57735		0.57735	1	1.1547	0.57735	0.57735	0	0		0.57735	1.52753	0.57735	0.57735	0	0		0	10.4083	3.60555	0.57735	0	4.04145	0.57735	1.52753		0

## Sheet: SI-Data Table 3 cations, anions
Sample Date	Study Day	Ca (mg/L)	Mg (mg/L)	Na (mg/L)	K (mg/L)	P (mg/L)	Cd (µg/L)	Co (µg/L)	Cu (µg/L)	Ni (µg/L)	Zn (µg/L)	Al (µg/L)	Fe (µg/L)	Mn (µg/L)	Pb (µg/L)	SO4 (mg/L)	Cl (mg/L)	NO3 (mg/L)	Alkalinity (mg/L as CaCO3)	Hardness (mg/L as CaCO3)
2013-02-22	2	7.7	1.76	2.9	1.4	< 0.02	< 0.02	0.03	2	0.5	4	20	50	2	0.2	3.01628	2.16263	0.415433	26.8	26.4746
2013-02-27	7	7.63	1.86	3.3	1.2	< 0.02	< 0.02	0.03	1	0.4	3	20	40	1	0.1	3.23242	2.38244	0.291423	27.7	26.7116
2013-03-06	14	8.2	1.93	3.1	1.2	< 0.02	< 0.02	0.03	1	0.5	9.4	20	30	0.7	0.09	3.18919	1.86483	0.421633	28	28.4231
2013-03-11	19	7.98	1.94	3	1.2	< 0.02	< 0.02	0.02	1	0.4	2	10	30	0.5	0.06	3.24683	1.93928	0.37823	28.3	27.915
2013-03-20	28	8.19	1.96	3.1	1.3	< 0.02	0.06	0.02	1	0.4	6.1	9	< 30	< 0.5	0.69	3.24683	2.113	0.520841	28.6	28.5217
2013-03-24	32	8.35	1.98	3.1	1.2	< 0.02	< 0.02	0.02	0.9	0.4	0.8	6	< 30	< 0.5	< 0.05	3.24202	1.94992	0.365829	28.7	29.0036
Average	ave.	8.00833	1.905	3.08333	1.25	< 0.02	0.0266667	0.025	1.15	0.433333	4.21667	14.1667	35	0.866667	0.198333	3.1956	2.06868	0.398898	28.0167	27.8416
Standard deviation	SD	0.291713	0.0819146	0.132916	0.083666	na	0.0163299	0.00547723	0.41833	0.0516398	3.11539	6.52431	8.3666	0.588784	0.246691	0.090504	0.190601	0.0758051	0.702614	1.02976
Quality Control Sample Data (MPV = most probable value, nr = not reported, na = not applicable because MPV not reported)
Lab No		Ca (mg/L)	Mg (mg/L)	Na (mg/L)	K (mg/L)	P (mg/L)	Cd (µg/L)	Co (µg/L)	Cu (µg/L)	Ni (µg/L)	Zn (µg/L)	Al (µg/L)	Fe (µg/L)	Mn (µg/L)	Pb (µg/L)
T-183		12	8.6	12.6	2.7	< 0.02	5.96	4.3	3.4	1.5	106	130	200	50.5	6.49
T-183 MPV		11.6	7.39	12.7	2.6	nr	5.35	3.94	3.1	1.2	86.4	130	200	49	5.89
% RECOVERY		1.03448	1.16373	0.992126	1.03846	na	1.11402	1.09137	1.09677	1.25	1.22685	1	1	1.03061	1.10187
T-201		57.1	25.6	46.4	5.46	< 0.02	17.7	18.8	23.7	71.2	1350	88	1500	1840	79.3
T-201 MPV		53.1	23.8	47.6	5.24	nr	15.7	17.4	20.8	64	1110	78	1800	1800	73.9
% RECOVERY		1.07533	1.07563	0.97479	1.04198	na	1.12739	1.08046	1.13942	1.1125	1.21622	1.12821	0.833333	1.02222	1.07307
T-207		24.9	6.88	20.6	2.3	< 0.02	0.64	1.04	9.7	2.3	246	360	370	244	5.4
T-207 MPV		23.4	6.19	21.5	2.2	nr	0.59	0.98	8.4	1.7	200	320	430	237	4.8
% RECOVERY		1.0641	1.11147	0.95814	1.04545	na	1.08475	1.06122	1.15476	1.35294	1.23	1.125	0.860465	1.02954	1.125
M-178		57.7	20.8	39.9	6.77	0.07	1.1	3.58	0.8	15.1	335	< 5	< 30	1070	< 0.05
M-178 MPV		53.2	18.4	39.9	6.3	nr	nr	nr	nr	nr	nr	nr	nr	nr	nr
% RECOVERY		1.08459	1.13043	1	1.0746	na	na	na	na	na	na	na	na	na	na

## Sheet: SI Data Table 4 Daily log
Date	Stream	Conductivity	Oxygen	Temperature	pH
2013-02-22	A5	63.1	8.71	10.2	6.2
2013-02-22	A4	66	8.86	9.6	6.4
2013-02-22	A8	65.6	8.98	9	6.4
2013-02-22	B3	65.2	9.14	9.1	6.5
2013-02-22	B1	64.1	8.94	9.3	6.55
2013-02-22	B4	63.9	8.94	9.2	6.55
2013-02-22	C3	66.6	8.92	9.1	6.55
2013-02-22	C7	66.8	8.97	9	6.59
2013-02-22	C2	63.2	8.93	9.4	6.62
2013-02-22	D9	64.6	8.9	9.1	6.62
2013-02-22	D2	64	8.93	9	6.68
2013-02-22	D6	65.3	8.97	9	6.72
2013-02-23	A8	67.7	8.48	8.5	6.77
2013-02-23	A7	67	8.93	9.2	6.83
2013-02-23	A2	65.3	8.77	9.1	6.82
2013-02-23	B5	65.8	8.81	9.3	6.81
2013-02-23	B6	63.8	8.76	9.3	6.83
2013-02-23	B8	65.3	8.75	9.3	6.75
2013-02-23	C9	64.1	8.82	8.9	6.57
2013-02-23	C3	65.6	8.87	9	6.54
2013-02-23	C1	66.1	8.83	9.1	6.54
2013-02-23	D7	64.5	8.81	9.1	6.54
2013-02-23	D5	64.8	9.21	8.6	6.6
2013-02-23	D2	67.3	8.85	9.2	6.66
2013-02-24	A6	71.4	9.07	8.7	6.74
2013-02-24	A1	76.3	9.06	8.6	6.78
2013-02-24	A2	65.1	9.13	8.6	6.81
2013-02-24	B8	65.4	8.95	8.9	6.96
2013-02-24	B3	67.8	9.04	9	7.03
2013-02-24	B4	66.7	9.08	8.7	7.12
2013-02-24	C7	65.2	9.09	8.5	7.17
2013-02-24	C8	63.9	9.06	8.6	7.26
2013-02-24	C1	66	8.99	9.1	7.28
2013-02-24	D5	65.5	9	8.3	7.3
2013-02-24	D8	63.5	9.08	8.3	7.35
2013-02-24	D6	66.5	8.61	11	7.37
2013-02-25	A5	65.7	8.8	10.4	n/a
2013-02-25	A8	64.9	8.92	9.4	n/a
2013-02-25	A4	65.3	8.96	9.3	n/a
2013-02-25	B7	66.7	8.91	9.4	n/a
2013-02-25	B8	65.7	8.89	9.5	n/a
2013-02-25	B5	66.9	8.87	9.3	n/a
2013-02-25	C2	65.2	8.89	9.6	n/a
2013-02-25	C3	66.4	8.86	9.6	n/a
2013-02-25	C8	63.8	9.22	9.3	n/a
2013-02-25	D9	64.6	8.87	9.5	n/a
2013-02-25	D4	63.8	8.84	9.4	n/a
2013-02-25	D3	63.7	8.88	9.4	7.04
2013-02-26	A8	63.8	8.95	9.1	n/a
2013-02-26	A4	66.2	9.06	9.1	n/a
2013-02-26	A6	65	9.1	9	n/a
2013-02-26	B1	65.5	8.76	10.1	n/a
2013-02-26	B2	65.5	8.8	9.8	n/a
2013-02-26	B4	65.9	8.88	9.5	n/a
2013-02-26	C7	64.7	9.01	9.1	n/a
2013-02-26	C6	64.8	8.87	9.6	n/a
2013-02-26	C5	64.7	8.95	9.5	n/a
2013-02-26	D2	64.4	9.06	9	n/a
2013-02-26	D5	65.6	9.03	9	n/a
2013-02-26	D6	65.7	8.96	9.2	n/a
2013-02-27	A1	68.7	8.78	11.5	7
2013-02-27	A5	66	9.02	10.5	6.88
2013-02-27	A7	65.4	8.82	10	6.91
2013-02-27	B5	66.9	8.96	9.5	6.77
2013-02-27	B7	66.9	8.96	9.5	6.72
2013-02-27	B8	65.9	8.96	9.5	6.63
2013-02-27	C1	66.1	8.95	9.6	7.23
2013-02-27	C3	66.8	8.96	9.7	7.42
2013-02-27	C7	65.4	8.92	9.5	7.35
2013-02-27	D3	66.1	8.93	9.8	7.31
2013-02-27	D4	64.4	8.87	9.7	7.18
2013-02-27	D9	65	8.91	9.8	7.17
2013-02-28	A1	70.2	8.75	10.5	n/a
2013-02-28	A5	66.3	8.87	10	n/a
2013-02-28	A8	65.2	9.05	9.4	n/a
2013-02-28	B2	66.3	8.91	10.1	n/a
2013-02-28	B4	65.8	8.94	9.5	n/a
2013-02-28	B8	66.2	8.97	9.5	n/a
2013-02-28	C3	68.5	8.96	9.8	n/a
2013-02-28	C5	65.9	8.93	9.8	n/a
2013-02-28	C6	65.4	8.94	9.8	n/a
2013-02-28	D3	66.3	8.87	10.1	n/a
2013-02-28	D4	71.7	8.82	10	n/a
2013-02-28	D9	69.6	8.87	10	n/a
2013-03-01	A2	63.2	9.06	12	7.54
2013-03-01	A6	64.5	9.03	10.3	7.5
2013-03-01	A7	65.8	8.9	9.7	7.46
2013-03-01	B1	67.2	8.89	10	7.44
2013-03-01	B5	66.9	9.16	9.6	7.4
2013-03-01	B7	67.4	8.88	9.7	7.3
2013-03-01	C1	67.7	8.83	10	7.3
2013-03-01	C3	66.9	8.89	9.7	7.23
2013-03-01	C7	65.9	8.91	9.5	7.25
2013-03-01	D5	66.6	8.86	10.1	7.19
2013-03-01	D6	65.8	8.81	10.2	7.11
2013-03-01	D8	65.5	8.8	10.2	7.08
2013-03-04	A8	65	8.8	9.6	6.57
2013-03-04	A5	65.6	8.88	9.7	6.64
2013-03-04	A2	65.9	8.95	9.5	6.76
2013-03-04	B7	66.8	8.98	9.5	6.75
2013-03-04	B5	68.8	9.02	9.4	6.8
2013-03-04	B1	67.9	9.03	9.4	6.82
2013-03-04	C7	66.4	9.03	9.1	6.88
2013-03-04	C3	67.3	9.05	9.3	6.93
2013-03-04	C1	67.7	9.03	9.5	6.95
2013-03-04	D8	69.6	8.97	9.7	6.98
2013-03-04	D5	66.8	8.87	9.5	7.06
2013-03-04	D3	65.9	9	9.5	7.09
2013-03-06	A8	68.5	8.92	9.8	6.87
2013-03-06	A2	67.9	9.22	8.8	6.91
2013-03-06	A5	68.2	9.07	9.1	6.93
2013-03-06	B1	68.8	9.01	9.6	6.97
2013-03-06	B2	68.2	8.96	9.8	6.96
2013-03-06	B7	68.7	8.97	9.5	7.03
2013-03-06	C3	68.3	9.04	9.4	7.11
2013-03-06	C5	66.7	9.05	9.3	7.17
2013-03-06	C7	66.5	9.08	9	7.24
2013-03-06	D5	67.4	9.07	9.5	7.39
2013-03-06	D4	66	9.01	9.6	7.27
2013-03-06	D8	67.5	8.95	9.9	7.48
2013-03-08	A8	64.8	8.22	9.6	7.18
2013-03-08	A5	67.8	8.62	9.9	7.11
2013-03-08	A2	67.3	8.77	9.6	7.06
2013-03-08	B7	68.7	8.77	9.9	6.96
2013-03-08	B5	68.4	8.81	9.6	6.89
2013-03-08	B2	67.1	8.8	10.1	6.83
2013-03-08	C1	67.3	8.99	10.2	6.75
2013-03-08	C3	68.5	8.82	10	6.66
2013-03-08	C5	66.8	8.87	10.4	6.67
2013-03-08	D8	67.1	8.85	10.8	7.1
2013-03-08	D4	66.3	8.73	10.2	6.54
2013-03-08	D3	66	8.81	11.6	6.84
2013-03-10	A2	67.6	8.75	10.2	7.28
2013-03-10	A5	67.3	8.75	10.2	7.25
2013-03-10	A8	67.7	8.86	9.9	7.25
2013-03-10	B2	69.3	8.91	9.9	7.25
2013-03-10	B5	68.1	8.93	9.9	7.28
2013-03-10	B7	68.3	8.95	9.9	7.29
2013-03-10	C1	67.5	8.95	9.8	7.31
2013-03-10	C3	68.9	8.98	9.6	7.29
2013-03-10	C5	68.1	9	9.5	7.3
2013-03-10	D4	66.3	8.95	9.4	7.31
2013-03-10	D6	68	8.87	9.6	7.33
2013-03-10	D8	67.5	8.95	9.8	7.41
2013-03-12	A8	67.6	8.75	11.1	7.47
2013-03-12	A2	68.4	8.64	10.4	7.35
2013-03-12	B2	69.1	8.81	10	7.34
2013-03-12	B5	70.4	8.87	9.7	7.26
2013-03-12	B7	68.7	8.89	9.7	7.21
2013-03-12	C3	68.9	8.93	10	7.19
2013-03-12	C1	67.9	8.91	10.4	7.15
2013-03-12	D8	67.6	8.89	10.7	6.84
2013-03-12	D6	68.6	8.84	10.7	6.95
2013-03-12	D4	66.6	8.82	10	7.48
2013-03-14	A8	65.2	8.71	9.9	7.52
2013-03-14	A2	68.7	8.7	10.1	7.44
2013-03-14	B2	68.9	8.76	10.2	7.4
2013-03-14	B5	70.1	8.85	10	7.29
2013-03-14	C1	67.9	8.87	9.8	7.32
2013-03-14	C3	68.9	8.93	9.7	7.2
2013-03-14	D4	68.8	8.9	9.8	7.15
2013-03-14	D6	68.7	8.96	10.5	7.12
2013-03-14	D8	84	8.92	11.4	7.08
2013-03-16	A8	77.9	8.74	12.3	7.04
2013-03-16	A2	69.4	8.82	11.1	6.57
2013-03-16	B2	78.8	8.76	10.2	7.2
2013-03-16	C3	70	8.69	10.1	7.26
2013-03-16	D6	66.2	8.77	10.5	7.18
2013-03-16	D4	67.2	8.57	10.1	7.46
2013-03-19	A8	66.3	8.36	9.5	7.94
2013-03-19	A2	69.1	8.71	9.8	7.91
2013-03-19	B2	70.4	8.72	10.2	7.9
2013-03-19	C3	71.2	8.79	9.9	7.87
2013-03-19	D4	67.9	8.72	10	7.78
2013-03-19	D6	69.4	8.78	10.8	7.76
2013-03-20	A8	68.9	8.49	10.3	7.34
2013-03-20	D4	67.4	8.49	10.2	7.39
2013-03-20	D6	69.3	8.63	10.3	7.4
2013-03-24	A8	68.4	8.76	10.1	7.06
2013-03-24	D4	68.5	8.59	10.1	7.19
2013-03-24	D6	70.8	8.81	10.4	7.01
		Conductivity	Oxygen	Temperature	pH
		67.0558	8.88696	9.70552	7.06808
		2.59125	0.146273	0.63707	0.337778

## Sheet: SI Data Table 5 Emergence
Experiment	StreamID	Date	Day	Ameletus sp.	Baetis sp.	Orthocladiinae	Tanypodinae	Tanytarsini	Chironomini	Diamesinae	Psychodidae (Pericoma sp.)	Simuliidae (Simulium sp.)		Mayflies	Diptera	Cumulative total (by stream)
MRP1	A-1	2013-09-12	4							1				0	1	1
MRP1	A-1	2013-09-14	6			1								0	1	2
MRP1	A-1	2013-09-16	8		1									1	0	3
MRP1	A-1	2013-09-18	10		1									1	0	4
MRP1	A-1	2013-09-20	12			2								0	2	6
MRP1	A-1	2013-09-21	13	1	1									2	0	8
MRP1	A-1	2013-09-29	21			1								0	1	9
MRP1	A-2	2013-09-11	3	1		2								1	2	3
MRP1	A-2	2013-09-12	4		1									1	0	4
MRP1	A-2	2013-09-14	6		1									1	0	5
MRP1	A-2	2013-09-15	7		1	2				1				1	3	9
MRP1	A-2	2013-09-16	8			1								0	1	10
MRP1	A-2	2013-09-17	9		3	1								3	1	14
MRP1	A-2	2013-09-18	10			1		1						0	2	16
MRP1	A-2	2013-09-19	11		2									2	0	18
MRP1	A-2	2013-09-20	12			1								0	1	19
MRP1	A-2	2013-09-21	13			3		1						0	4	23
MRP1	A-2	2013-09-22	14			1				1				0	2	25
MRP1	A-3	2013-09-09	1									1		0	1	1
MRP1	A-3	2013-09-10	2								1			0	1	2
MRP1	A-3	2013-09-12	4		1									1	0	3
MRP1	A-3	2013-09-13	5		1									1	0	4
MRP1	A-3	2013-09-14	6				1							0	1	5
MRP1	A-3	2013-09-15	7		2									2	0	7
MRP1	A-3	2013-09-16	8								1			0	1	8
MRP1	A-3	2013-09-17	9				2							0	2	10
MRP1	A-3	2013-09-20	12		1									1	0	11
MRP1	A-3	2013-09-26	18				1							0	1	12
MRP2	A8	2014-11-01	25			2								0	2	2
MRP2	A8	2014-11-05	29			1								0	1	3
MRP2	A8	2014-11-07	31			1		1						0	2	5
MRP2	B9	2014-11-04	28					1						0	1	1
MRP2	B9	2014-11-05	29						1					0	1	2
MRP2	B9	2014-11-07	31			2		1						0	3	5
MRP2	C8	2014-11-07	31			1								0	1	1
MRP2	D7	2014-10-31	24					1						0	1	1
MRP2	D7	2014-11-04	28					1						0	1	2
MRP2	D7	2014-11-05	29					1						0	1	3
MRP2	D7	2014-11-06	30					3						0	3	6
MRP2	D7	2014-11-07	31					1						0	1	7
Bifenthrin	B9	2014-12-07	18		1									1	0	1
Bifenthrin	B9	2014-12-09	20					1						0	1	2
Bifenthrin	B9	2014-12-10	21					2						0	2	4
Bifenthrin	B9	2014-12-11	22		1			1						1	1	6
Bifenthrin	B9	2014-12-13	24			1								0	1	7
Bifenthrin	B9	2014-12-14	25			1								0	1	8
Bifenthrin	B9	2014-12-15	26			3								0	3	11
Bifenthrin	B9	2014-12-16	27			2								0	2	13
Bifenthrin	B9	2014-12-17	28			1								0	1	14
Bifenthrin	B9	2014-12-19	30			1								0	1	15
Bifenthrin	C7	2014-12-09	20			2								0	2	2
Bifenthrin	C7	2014-12-10	21					1						0	1	3
Bifenthrin	C7	2014-12-11	22					1						0	1	4
Bifenthrin	C7	2014-12-12	23			2		1						0	3	7
Bifenthrin	C7	2014-12-13	24					1						0	1	8
Bifenthrin	C7	2014-12-14	25			1		1						0	2	10
Bifenthrin	C7	2014-12-15	26		1	2		2						1	4	15
Bifenthrin	C7	2014-12-16	27			1								0	1	16
Bifenthrin	C7	2014-12-17	28			1		3						0	4	20
Bifenthrin	C7	2014-12-18	29					2						0	2	22
Bifenthrin	C7	2014-12-19	30			1								0	1	23
Bifenthrin	D3	2014-12-09	20			1								0	1	1
Bifenthrin	D3	2014-12-10	21		1									1	0	2
Bifenthrin	D3	2014-12-11	22			2								0	2	4
Bifenthrin	D3	2014-12-14	25			1								0	1	5
Bifenthrin	D3	2014-12-15	26									1		0	1	6
Bifenthrin	D3	2014-12-16	27			2								0	2	8
Bifenthrin	D3	2014-12-17	28			1								0	1	9
Bifenthrin	D3	2014-12-19	30			2								0	2	11
Bifenthrin	D9	2014-12-08	19			1		2						0	3	3
Bifenthrin	D9	2014-12-09	20			1								0	1	4
Bifenthrin	D9	2014-12-10	21			1								0	1	5
Bifenthrin	D9	2014-12-11	22							1				0	1	6
Bifenthrin	D9	2014-12-12	23			2		1						0	3	9
Bifenthrin	D9	2014-12-13	24			2								0	2	11
Bifenthrin	D9	2014-12-14	25			2								0	2	13
Bifenthrin	D9	2014-12-15	26			2								0	2	15
Bifenthrin	D9	2014-12-16	27			2								0	2	17
Bifenthrin	D9	2014-12-17	28			3								0	3	20
Bifenthrin	D9	2014-12-18	29			3								0	3	23
Bifenthrin	D9	2014-12-19	30		1	1								1	1	25
MRP3	A5	2015-09-10	2			3								0	3	3
MRP3	A5	2015-09-11	3			2								0	2	5
MRP3	A5	2015-09-12	4			2								0	2	7
MRP3	A5	2015-09-13	5			1								0	1	8
MRP3	A5	2015-09-18	10			1								0	1	9
MRP3	A5	2015-10-01	23			1								0	1	10
MRP3	A5	2015-10-02	24			1								0	1	11
MRP3	A5	2015-10-03	25			1								0	1	12
MRP3	A5	2015-10-04	26			1								0	1	13
MRP3	A5	2015-10-05	27			1								0	1	14
MRP3	B7	2015-09-10	2			4								0	4	4
MRP3	B7	2015-09-12	4			3						1		0	4	8
MRP3	B7	2015-09-13	5			3								0	3	11
MRP3	B7	2015-09-14	6			2								0	2	13
MRP3	B7	2015-09-16	8		1									1	0	14
MRP3	B7	2015-09-17	9			2								0	2	16
MRP3	B7	2015-09-18	10			1								0	1	17
MRP3	B7	2015-09-21	13			1								0	1	18
MRP3	B7	2015-10-03	25			1								0	1	19
MRP3	B7	2015-10-08	30			1								0	1	20
MRP3	B7	2015-10-09	31			1								0	1	21
MRP3	C3	2015-09-10	2			2								0	2	2
MRP3	C3	2015-09-11	3			5								0	5	7
MRP3	C3	2015-09-12	4			3								0	3	10
MRP3	C3	2015-09-13	5			2								0	2	12
MRP3	C3	2015-09-14	6					1						0	1	13
MRP3	C3	2015-09-15	7			2								0	2	15
MRP3	C3	2015-09-16	8			1		1						0	2	17
MRP3	C3	2015-09-17	9					1	1					0	2	19
MRP3	C3	2015-09-18	10			1								0	1	20
MRP3	C3	2015-09-19	11			1								0	1	21
MRP3	C3	2015-09-21	13			2								0	2	23
MRP3	C3	2015-09-27	19			2		1						0	3	26
MRP3	C3	2015-10-05	27			1								0	1	27
MRP3	C3	2015-10-09	31			2								0	2	29
MRP3	D9	2015-09-10	2			2								0	2	2
MRP3	D9	2015-09-11	3			3								0	3	5
MRP3	D9	2015-09-12	4			4						1		0	5	10
MRP3	D9	2015-09-13	5			2								0	2	12
MRP3	D9	2015-09-14	6			2								0	2	14
MRP3	D9	2015-09-15	7			1								0	1	15
MRP3	D9	2015-09-18	10			1								0	1	16
MRP3	D9	2015-09-21	13			1								0	1	17
MRP3	D9	2015-10-08	30			1								0	1	18

## Sheet: SI Data Table 6 Larvae
	Control Experiment								MRP 1							MRP 2									Bifenthrin						MRP 3
Taxa	Day 0 -1	Day 0 - 2	Day 0 - 3	Day 0 - 4	Day 32 - D4	Day 32 - A8	Day 32 - D6		Day 0 - 1	Day 0 - 2	Day 0 -3	A1	A2	A3		Day 0 - 1	Day 0 - 2	Day 0 -3	Day 0 - 4	A8	B9	C8	D7		Day 0 - 1	B9	C7	D3	D9		Day 0 - 1	Day 0 - 2	Day 0 - 3	Day 0 - 4	Day 30 - 1	Day 30 - 2	Day 30 - 3	Day 30 - 4	A5	B7	C3	D9
Ephemeroptera (total)	56	145	191	101	62	58	83		91	122	111	60	130	84		67	139	155	183	96	133	97	79		77	85	58	32	65		483	494	441	436	324	429	364	351	199	251	201	299
Ameletus sp.	1								3	8	5	3	1	1			2	5	1	0	5	2	1				4		1		3	1	2	1	8	11	22	15		1		3
Baetidae	31	123	165	75	46	28	58
Baetis sp.									50	74	57	3	17	4		15	35	50	38	11	10	4	4
Baetis tricaudatus																									18	27	22	11	25		24	20	15	24	29	27	18	29	12	10	8	16
Diphetor hageni									2	1		10	15	5						32	41	22	2			11	7	1	6				1		2	1	1		6	11	11	12
Drunella doddsii			4		1				5		3	2		1		4	8	6	2		1				4	1			1		21	39	32	20	20	15	12	21	7	7	5	7
Drunella grandis/coloradensis				1			1		8	18	28	1	4	3		17	6	5	11	6	4	5	5		4	2	2	2	1		53	60	36	49	20	23	6	24	13	8	11	15
Ephemerella sp.																3	22	22	42	17	28	24	23		16	4	6	6	5		107	126	82	92	79	174	121	129	53	75	60	83
Ephemerella infrequens	2	1	2	9	1		1		11	9	7	22	78	53
Serratella sp.									1	1																						1	2
Cinygmula sp.	4	2	3		6	5	5		1			1	1	1			4	4	4	3	4	2			1	1	1	1				4		3	1		4	3
Epeorus sp.		3	3	4	3	8	7
Epeorus longimanus												2	6	3						15	7	11				6	4	4	16				1		11	13	6	3	1	1	2
Rhithrogena sp.	16	15	13	12	2	16	7		4	6	9	14	5	10		28	60	60	83	10	31	26	41		34	33	11	6	9		264	228	259	236	139	141	155	118	99	128	93	150
Paraleptophlebia sp.	2	1	1		3	1	4		6	5	2	2	3	3			2	3	2	2	2	1	3				1	1	1		11	15	11	11	15	24	19	9	8	10	11	13
Plecoptera (total)	36	18	21	39	3	7	5		5	6	6	3	5	7		12	22	16	28	14	28	19	9		27	45	55	18	55		10	15	7	16	9	5	6	13	2	2	3	9
Capniidae																	4	5	4	2	3	1	2		9	23	32	8	37		1	1		1	1	1	2	1
Capnia or Capnura sp.	33	18	18	33	2	4	2
Chloroperlidae			2	5		1	1			1						1		1					1
Sweltsa sp.	1					1	2		1	2	1		2	1		2	1			4			2		3	2	1		1		4	5	3	7	6	2	4	10	1		1	4
Triznaka signata																											1		1
Prostoia sp.																			1	3	12	5			3	18	18	8	15
Zapada cinctipes													1												1							1		1								1
Zapada oregonensis group									1
Claassenia sabulosa												1		1																					2	1
Hesperoperla pacifica																	1	2							2						2	1		1						1		3
Pteronarcella badia																8	11	5	19	5	10	11	3		6	2	1	1			1	1	2	1				2	1	1		0
Perlodidae																1			1
Diura knowltoni									1		1	1	1	1				2	1		3							1	1				1	2
Isoperla sp.						1
Isoperla fulva																	3		2			1	1		3		2				1	4	1	3		1					1
Skwala sp.	2		1	1	1
Skwala americana									2	3	4	1	1	4			2	1	0			1									1	2									1
Taenionema sp.																																									0	1
Trichoptera (total)	11	1	6	5	4	2	4		51	33	129	59	82	132		36	44	37	49	33	34	48	28		23	20	3	7	3		76	118	43	81	31	37	14	40	46	62	52	81
Brachycentrus americanus	3		3	1	1	1			1	1		1				2	3	1	2			1	1		1						4	2		1		5		2	1		1	1
Brachycentrus occidentalis									12	16	25	4	3	4		26	30	28	31	23	21	34	21		13	17	1	5	1		36	57	29	48	8	13	4	21	6	6	1	8
Micrasema bactro																				1
Arctopsyche grandis		1	1		1		1		1	1	2		1	1		5	5	7	15	1	9	4	2		9	1	1		2		9	24	10	21	7	2	1	8	6	4	8	4
Hydropsyche cockerelli																																										1
Hydropsyche oslari									1	1	1	1					1														1	16	3	6	2	3		2	2	1	4
Lepidostoma sp.	8		1	4	2		3		36	14	101	53	78	127		3	5	1	1	8	4	9	4			2	1	2			26	19	1	5	14	14	9	7	31	51	38	67
Glossosoma sp.			1			1
Coleoptera
Heterlimnius corpulentus				1															1
Optioservus sp.																																				1
Diptera	79	27	39	80	77	97	90		64	34	34	6	23	15		16	12	15	14	45	30	16	17		5	10	19	8	21		53	98	74	77	19	32	35	28	17	21	36	31
Diptera pupae (total)					9	11	8		0	0	0	0	0	0		0	0	0	0	3	1	1	5		0	3	2	1	3		6	9	6	9	0	0	0	0	2	1	0	0
Atherix pachypus									1		1	1	3			10	8	10	10	2	1	4	4				1				20	34	30	30	7	14	10	13	12	6	10	12
Bibiocephala sp.																																1
Chelifera sp.																					1	1										1		1
Clinocera sp.	1			2	1		1
Antocha sp.																																				1
Dicranota sp.																													1		2		1	2	3			2
Neoplasta sp.														1
Simuliidae (total)		2	1	2	19	22	27		0	1	4	0	0	0		0	0	0	0	0	0	0	0		0	0	0	0	0		1	7	5	2	0	0	0	0	1	0	0	0
Simulium sp.										1	4																					4	4
Simulium sp. pupae																															1	3	1	2					1
Chironomidae (total)	78	25	38	76	48	64	54		63	33	29	5	20	14		6	4	5	4	43	28	11	13		5	10	18	8	20		30	55	38	42	9	17	25	13	4	15	26	19
Orthocladiinae (total)	16	21	16	29	8	3	10		19	9	6	1	0	1		1	0	2	1	17	18	7	3		0	8	12	6	13		28	54	36	35	5	11	7	6	1	4	2	2
Corynoneura sp.																					1													1
Corynoneura sp. pupae																																1
Cricotopus/Orthocladius sp.																				4	1	2	1				2		4		2		2	6		2				1
Cricotopus/Orthocladius sp. pupae																				1							1		2					1
Eukiefferiella sp.											1								1									3	1		5	23	9	8	1				1			1
Eukiefferiella sp. pupae																										1	1				1			1
Heleniella sp.																																		1	1	1	1
Heterotrissocladius sp.										2						1		2	0								4		2				1	1	3	8	6	5			1	1
Limnophyes sp.																																		1
Nanocladius sp.									2	2											1										1	6	10	2
Nanocladius sp. pupae																															4	2	5	2
Parametriocnemus sp.									4		1									1	1										4	3	3	4				1
Parametriocnemus sp. pupae																																								1
Rheocricotopus sp.									10	3	1									6	5	2				2	3	1	2		1			1
Rheocricotopus sp. pupae																				1	1		1			2		1
Thienemanniella sp.									3	1																					7	7	1	2
Thienemanniella sp. pupae																																1		1
Tvetenia sp.										1	3	1		1						4	8	2	1			3	1	1	2		3	9	5	2						2	1
Tvetenia sp. pupae																						1										2		1
Tanytarsini (total)	59	3	21	44	30	50	35		33	14	16	2	10	13		1	2	2	1	22	7	2	10		0	2	1	0	0		0	1	1	1	1	3	13	2	1	10	18	15
Cladotanytarsus sp.																																							1
Micropsectra/Tanytarsus sp.									14	2	2	1	1	5		1	2	2	1	16	7	2	6			2	1					1	1	1	1	3	13	2		9	18	14
Micropsectra/Tanytarsus sp. pupae																				1			4
Rheotanytarsus sp.									19	12	14	1	9	8						1																				1		1
Stempellina sp.																				4
Chironomini (total)									2	5	0	1	2	0		1	2	1	1	2	2	2	0		0	0	0	0	0		2	0	0	6	0	0	0	3	2	1	3	2
Paracladopelma sp.									1	4																					2			4
Paracladopelma sp. pupae																																		1
Phaenopsectra sp.																				1														1
Polypedilum sp.									1	1		1	2			1	2	1	1	1	2	2																3	1	1	3	2
Polypedilum sp. pupae																																							1
Tanypodinae (total)	3	1	1	3	1		1		6	5	2	1	8	0		1	0	0	0	2	1	0	0		0	0	1	1	2		0	0	0	0	3	3	5	2	0	0	3	0
Thienemannimyia group									6	5	2	1	8			1				2	1						1	1	2						3	3	5	2			3
Diamesinae (total)									3	0	5	0	0	0		2	0	0	1	0	0	0	0		5	0	4	1	5		0	0	1	0	0	0	0	0	0	0	0	0
Diamesa sp.																																	1
Pagastia sp.									3		5					2			1						5		4	1	4
Pagastia sp. pupae																													1
Miscellaneous
Acari (total)		1	1						8	10	7	3	2	3		9	5	7	3	7	1	4	3		1	1	3	0	1		10	6	2	8	2	1	1	7	3	5	1	1
Atractides sp.														1		3		1							1							1								2
Lebertia sp.									8	10	5	3	2	2		5	5	6	2	6	0	4	2			1	3		1		8	3	1	6	2	1	1	7	2	3	1	1
Sperchon sp.											2					1			1	1	1		1								2	2	1	2					1
Pisidium sp.										1
Naididae																38	2	4	4	2	25	12	8
Nematoda													1			1																		1								2
Polycelis coronata																2															1					1	1
Total	182	192	258	226	137	153	174		219	206	287	131	243	241		181	224	234	282	197	251	196	144		133	161	138	65	145		633	731	567	619	385	506	421	439	267	341	293	423

## Sheet: SI-Data Table 7 Baetidae size
		Size (mm)
Study Day	Stream ID	1	2	3	4	5	6	7	8	Total
Day 4	A3	5	52	28	11	9	3	0	0	108
Day 4	D7	2	30	19	5	6	2	0	0	64
Day 4	C9	1	14	1	4	3	2	0	0	25
Day 4	B6	0	45	29	8	9	1	0	0	92
Day 6	B3	0	5	27	21	7	3	1	0	64
Day 6	C8	0	5	21	6	1	4	1	0	38
Day 8	C2	0	42	46	33	12	6	1	1	141
Day 8	A4	1	84	51	20	15	6	4	0	181
Day 10	B4	0	24	68	29	6	4	1	0	132
Day 10	C6	1	44	29	5	6	5	2	0	92
Day 10	B8	1	102	64	26	12	5	2	0	212
Day 10	D2	0	34	24	9	4	3	1	0	75
Day 12	A6	4	64	13	12	8	4	1	1	107
Day 12	D9	1	29	43	18	10	3	2	0	106
Day 14	A7	23	96	41	15	14	3	1	1	194
Day 14	C7	1	14	15	6	0	0	1	0	37
Day 16	A1	3	52	40	14	5	4	2	1	121
Day 16	D3	2	59	26	7	1	3	1	1	100
Day 18	D5	7	111	37	5	7	6	1	0	174
Day 18	B1	0	62	30	4	2	4	0	0	102
Day 20	C5	0	19	48	12	6	6	4	2	97
Day 20	B7	3	21	47	14	9	13	4	0	111
Day 20	A5	0	24	69	25	8	2	1	1	130
Day 24	C1	0	6	34	7	0	2	0	0	49
Day 24	B5	3	55	18	4	2	1	0	0	83
Day 24	D8	1	20	0	0	1	0	0	0	22
Day 28	B2	6	40	3	1	0	0	0	0	50
Day 28	A2	0	15	18	0	0	0	0	0	33
Day 28	C3	0	36	52	7	1	0	0	0	96
Day 32	D4	4	31	7	2	0	0	0	1	45
Day 32	A8	8	17	2	1	0	0	0	0	28
Day 32	D6	9	40	7	2	0	0	0	0	58

## Sheet: SI-Data Table 8 Simuliidae_size
		Size (mm)
Study Day	Stream ID	1	2	3	4	5	6	7	8	Total
Day 4	D7			1						1
Day 4	C9		2							2
Day 4	B6			1	1					2
Day 6	B3		1							1
Day 6	C8				1					1
Day 8	C2		2	3						5
Day 8	A4		1	5	1					7
Day 10	B4			2	1					3
Day 10	B8			2						2
Day 10	D2			4	1					5
Day 12	A6				1					1
Day 12	D9			3	2	1				6
Day 14	A7			3	1					4
Day 16	A1				3	1				4
Day 16	D3				3					3
Day 18	B1			3	5	1				9
Day 18	D5		2	7	7	3				19
Day 20	C5		1	2	26	20	2			51
Day 20	B7			2	8	7				17
Day 20	A5			4	8	1	1			14
Day 24	C1			3	10	1				14
Day 24	B5			1	6	7	1			15
Day 24	D8			2	3	2				7
Day 28	B2			1	5	3	4	2		15
Day 28	A2		1	4	5	10	9			29
Day 28	C3			3	9	14	3	1		30
Day 32	D4			2	3	6	5	2	1	19
Day 32	A8			1	14	7				22
Day 32	D6				8	12	5	2		27

## Sheet: SI-Data Table 9 Baetid Classes
		Class
		I	II	III	IV
Sample ID	Sample Day	1	2	3	4	Total
A3	Day 4	80	26	2	0	108
D7	Day 4	44	18	2	0	64
C9	Day 4	14	8	3	0	25
B6	Day 4	74	15	3	0	92
B3	Day 6	29	33	2	0	64
C8	Day 6	23	15	0	0	38
C2	Day 8	93	45	4	0	142
A4	Day 8	124	46	11	0	181
C6	Day 10	51	38	2	0	91
B4	Day 10	81	43	7	0	131
B8	Day 10	144	58	5	0	207
D2	Day 10	52	18	4	0	74
A6	Day 12	76	27	3	0	106
D9	Day 12	63	36	7	0	106
A7	Day 14	146	37	7	0	190
C7	Day 14	28	9	0	0	37
A1	Day 16	83	31	3	0	117
D3	Day 16	74	25	1	0	100
D5	Day 18	134	28	8	0	170
B1	Day 18	87	9	6	0	102
C5	Day 20	66	20	10	1	97
B7	Day 20	54	22	17	3	96
A5	Day 20	92	31	3	1	127
C1	Day 24	38	8	1	1	48
B5	Day 24	66	14	0	0	80
D8	Day 24	21	0	0	1	22
B2	Day 28	47	2	0	0	49
A2	Day 28	27	6	0	0	33
C3	Day 28	56	40	0	0	96
D4	Day 32	38	6	1	0	45
A8	Day 32	27	0	0	0	27
D6	Day 32	53	5	0	0	58
